# Supplementary material
Source: PubMed Central journal article supplement (PMC2782834)
Supplement: NIHMS155859-supplement-Supp1.pdf [file NIHMS155859-supplement-Supp1.pdf]

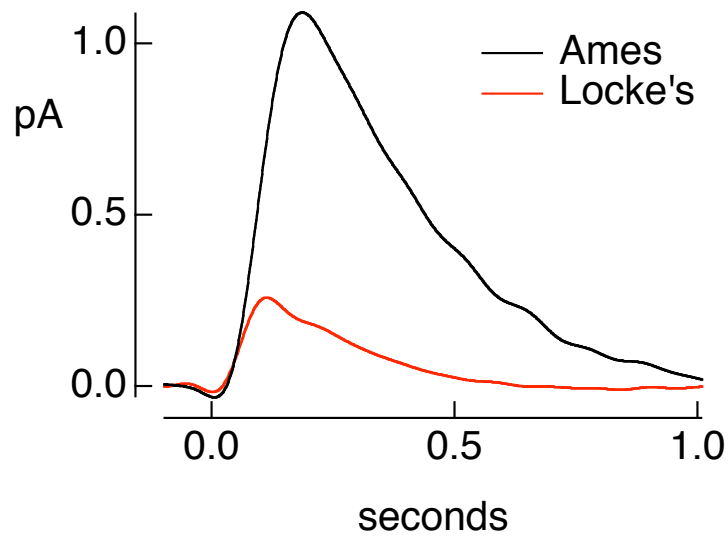

| Conditions         | peak amplitude (pA) | integration time (ms) | TPDE (ms)    |
|--------------------|---------------------|-----------------------|--------------|
| Ames (n=15)        | $0.98 \pm 0.02$     | $330 \pm 20$          | $320 \pm 10$ |
| L15/Locke's (n=12) | $0.27 \pm 0.03$     | $230 \pm 10$          | $230 \pm 30$ |

Figure S1: Experimental conditions affect the dim-flash response of wild-type rod photoreceptors. The black trace shows the average single-photon response of 11 wild-type mouse rods recorded at 37°C while the cells were perfused with bicarbonate-buffered Ames medium. Retina was stored in bicarbonate-buffered Ames at 32°C medium prior to recording. The red trace shows the average dim-flash response from 15 cells recorded at 37°C in Locke's medium. These cells were stored at 4°C in Leibowitz's L-15 medium prior to recording.
